# Supplementary material for: miR825-5p targets the TIR-NBS-LRR gene MIST1 and down-regulates basal immunity against Pseudomonas syringae in Arabidopsis
Source: PubMed Central journal article supplement (PMC8547151; doi:10.1093/jxb/erab354), 2021-07-30
Supplement: erab354_suppl_supplementary_figures_s1-s10_tables_s1-s9.pdf [file erab354_suppl_supplementary_figures_s1-s10_tables_s1-s9.pdf]

**Fig. S1**

**A**

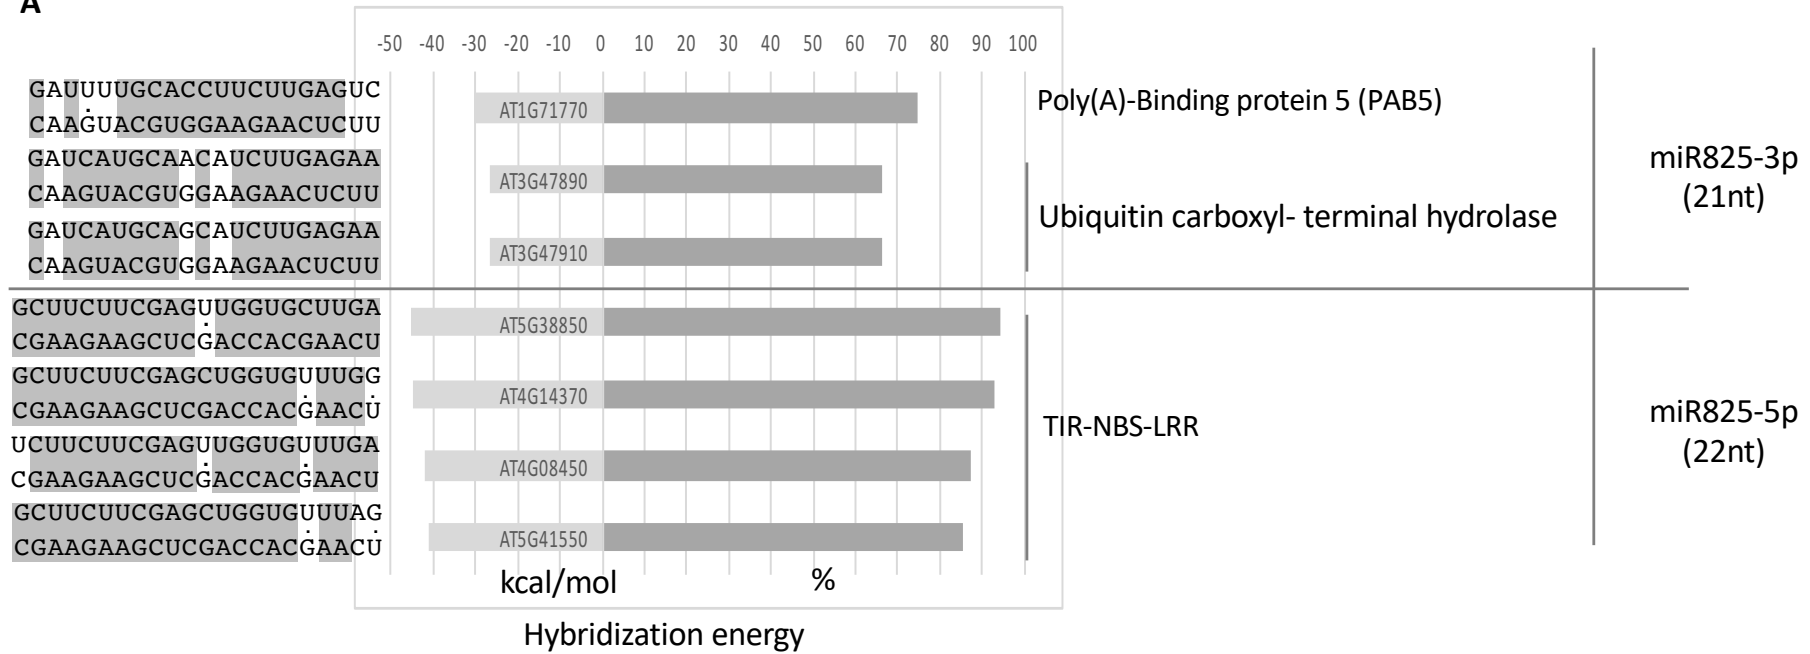

**B**

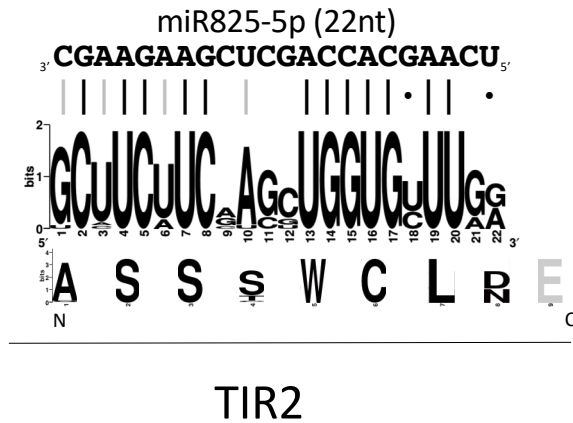

**C**

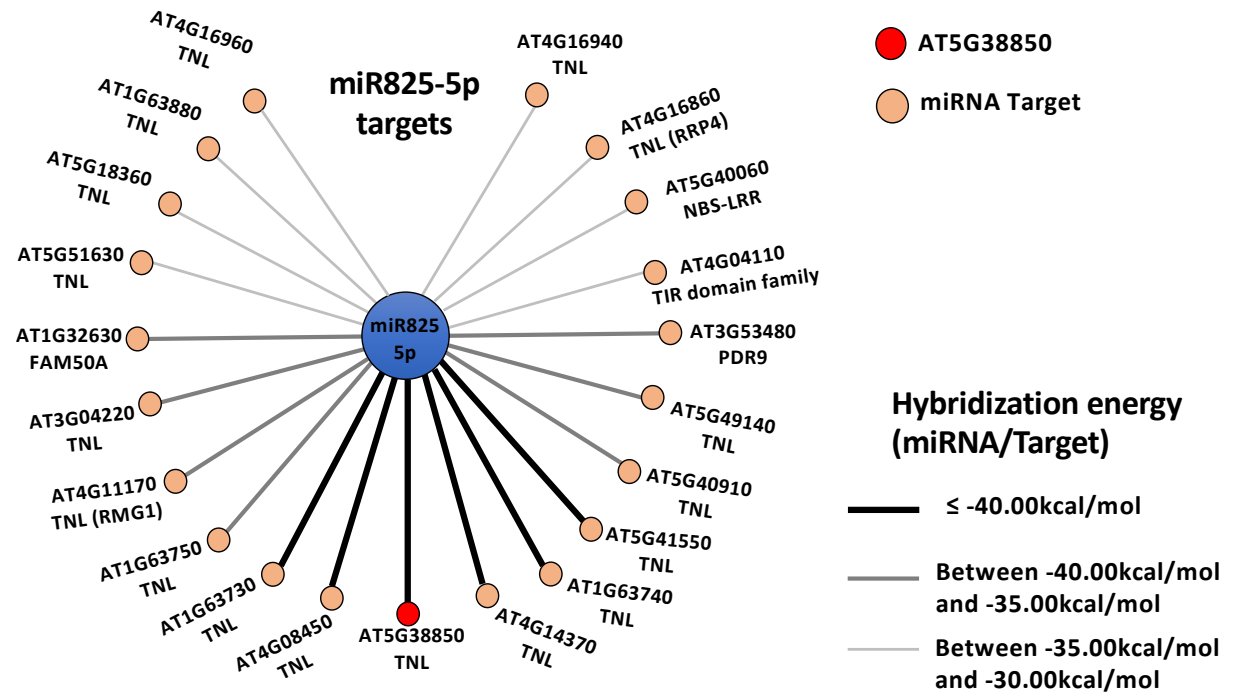

**Fig. S1 Target analysis revealed miR825-5p as a central hub for TNL gene regulation.** **A** We used WMD3 (Ossowski et al., 2008) and default parameters on Araport11 to predict targets for MIR825-encoded 21-nt (miR825-3p, formerly miR825) and 22-nt (miR825-5p; formerly miR825\*). All three predicted targets for 21-nt miR825-3p are shown. Only the top four predicted targets for 22-nt miR825 are shown. Predicted targets for 22-nt miR825 are genes encoding Toll/interleukin-1 (TIR), nucleotide binding site (NBS) and leucine-rich repeat (LRR) containing proteins (TIR-NBS-LRR). **B** MiR825-5p sequence paired with the consensus for 18 TNLs (plus one TIR domain protein) putative targets from the *Arabidopsis* genome. The logo corresponding to the consensus protein sequence for miR825-5p target site is shown below (black lines indicates perfect pairing, grey lines perfect pairing with the most conserved nucleotide, and dots indicate variable region that allows pairing at the RNA level). **C** Primary network showing all 21 putative targets for miR825-5p as predicted using WMD3 and default parameters on Araport11. TNL is indicated for the 17 out of these 21 that are annotated as such. Two additional genes encode a truncated TIR-NBS-LRR and a TIR domain-carrying protein.



**Fig. S2**

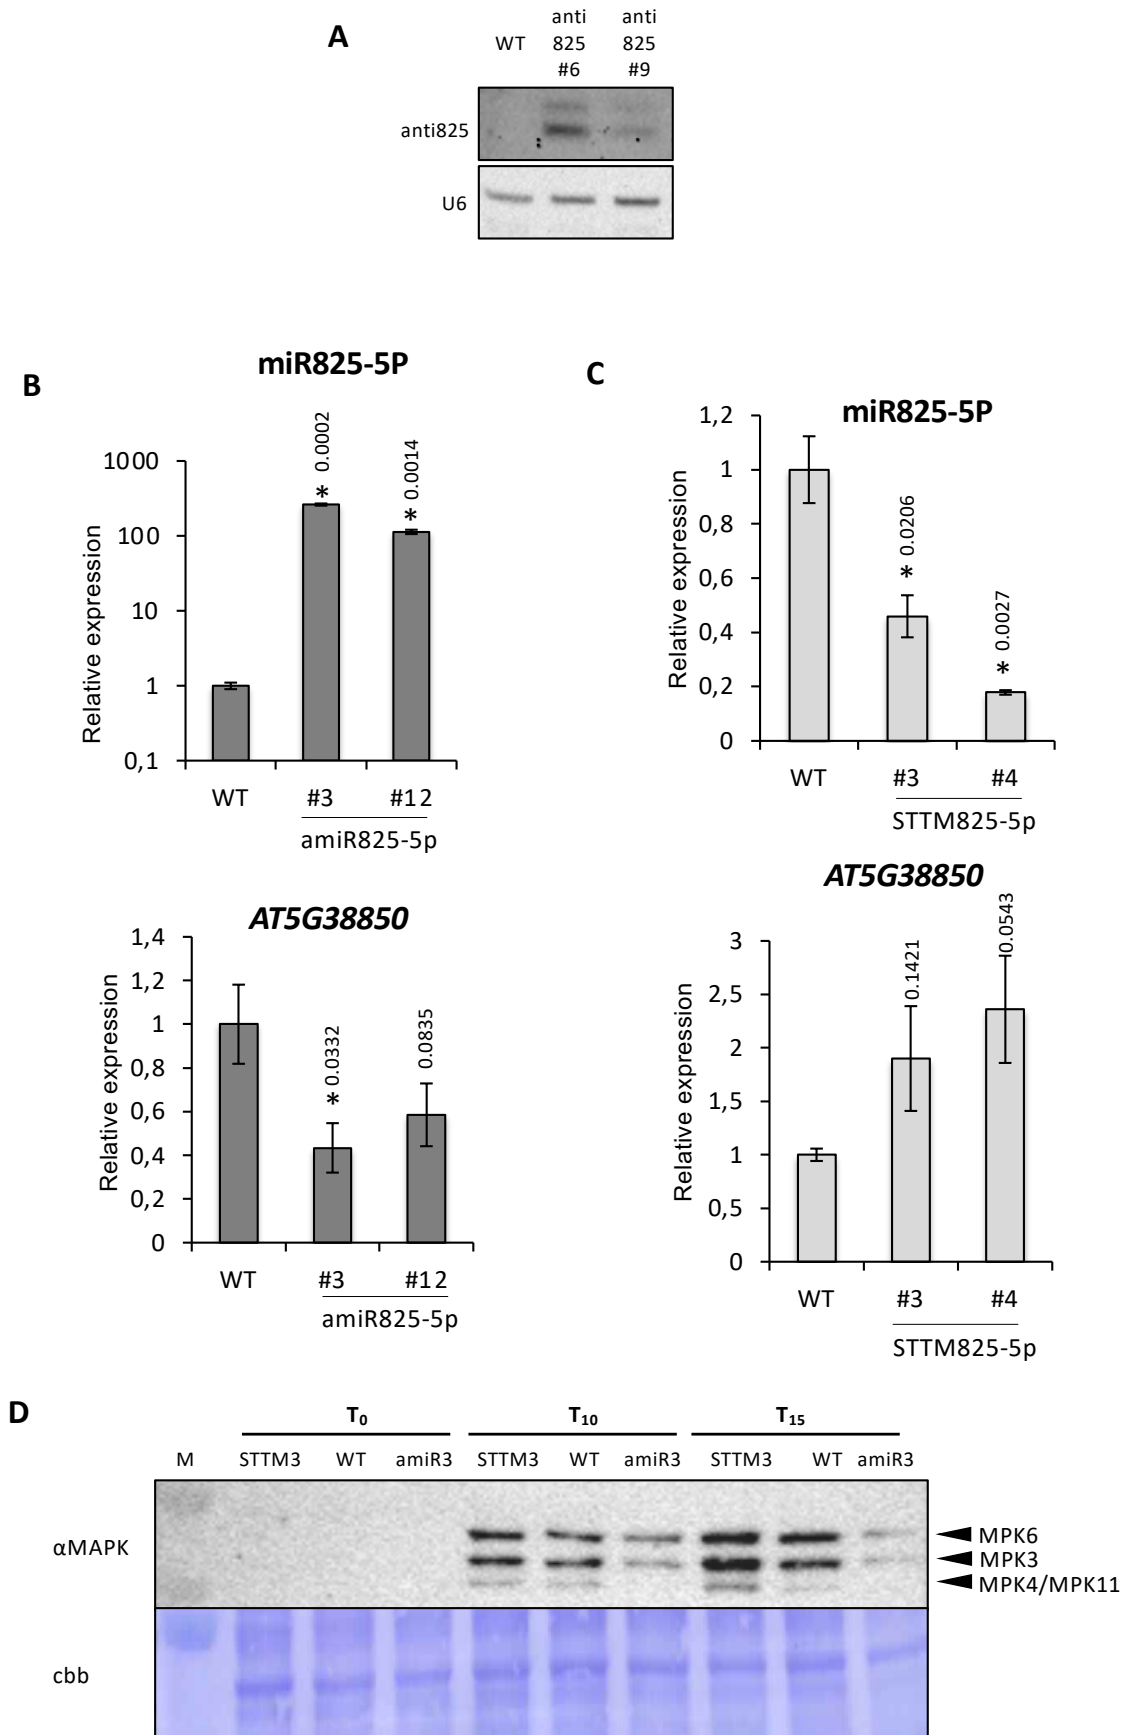

**Fig. S2 Controls for transgenic plants described in Fig. 2 and 3.** **A** Small RNA Northern blot assay showing accumulation of artificial miRNA (amiR anti825; supplemental methods; **Fig. S2a**) (Schwab, 2006; Ossowski *et al.*, 2008), resulting from the modification of the precursor for miR319 to target and silence pri-miR825. **B** Accumulation of miR825-5p (upper panel) and *AT5G38850* (lower panel) in amiR825-5p transgenic plants. Asterisks indicate results are significantly different from WT plants, as established by a Student's t-test ( $P < 0.05$ ). Error bars correspond to standard error. **C** Accumulation of miR825-5p (upper panel) and *AT5G38850* (lower panel) in STTM825-5p transgenic plants. Asterisks indicate results are significantly different from WT plants, as established by a Student's t-test ( $P < 0.05$ ). Error bars correspond to standard error. **D** Western Blot analysis showing levels of phosphorylated mitogen-activated protein kinases (MPK3, MPK4, MPK6 and MPK11) after treatment with 100 nM flg22 of wild type (WT), an STTM line, and an amiR line at three different time points (0, 10 or 15 min post flg22 treatment). Similar results were obtained with additional lines. Membrane was stained with Coomassie as a loading reference.

**Fig. S3**

SRR1171802

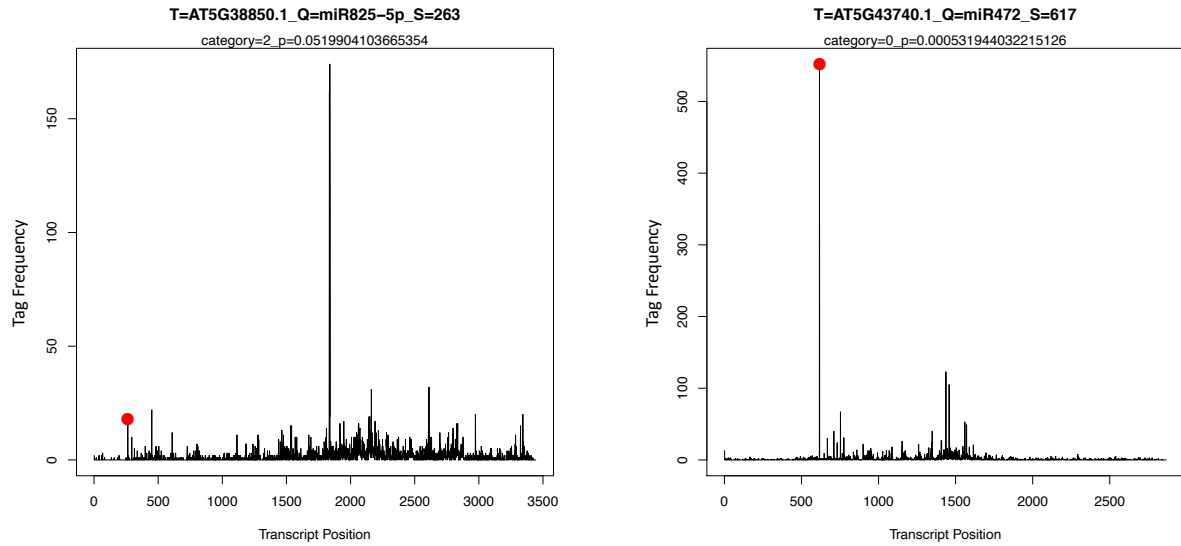

SRR1171804

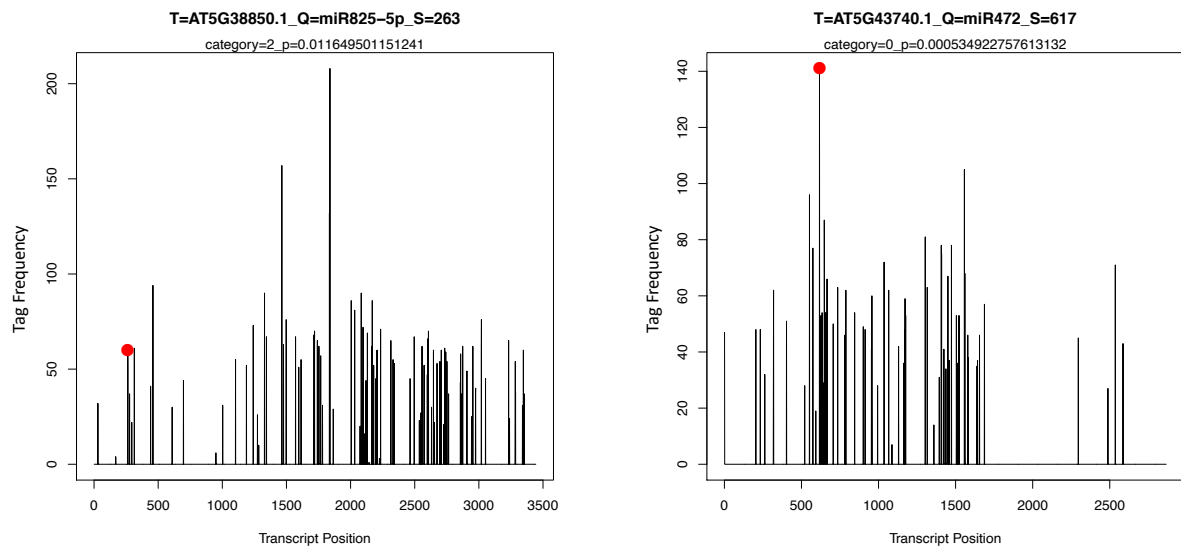

SRR10322040

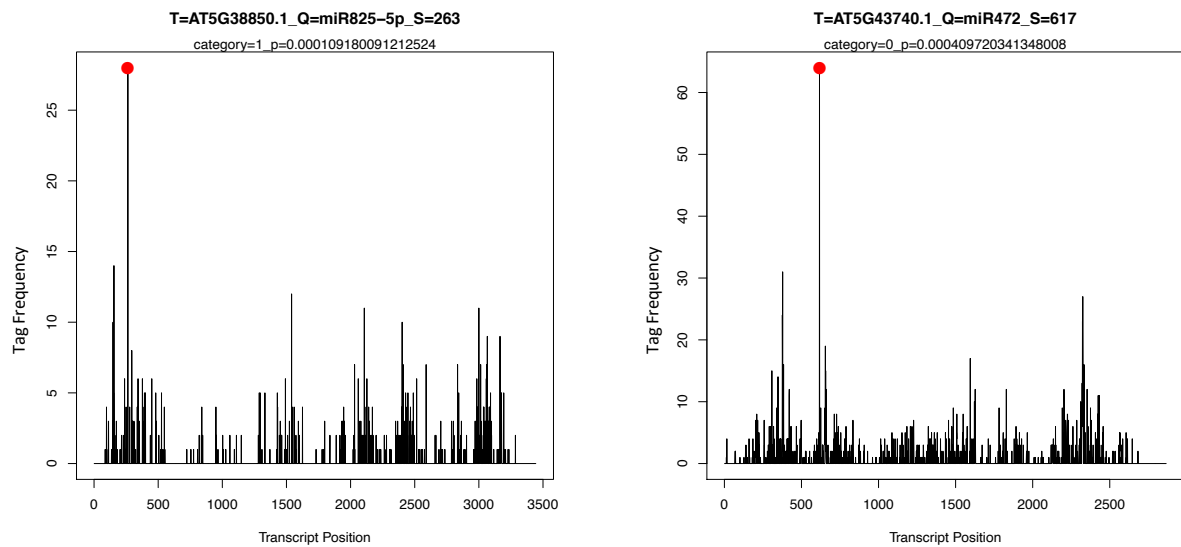

**Fig. S3 T-plots showing degradome tags for miRNA targets.** T-plots showing density of 5' position of degradome tags corresponding to *MIST1* (miR825-5p target) and *AT5G43740* (miR472 target) across different degradome libraries. The red dot indicates degradome tags starting at the predicted target site for miR825-5p or miR472 (slicing between 10th-11th nucleotides at complementary target site relative to the miRNA). Category refers to PARE read abundance of that position (Addo-Quaye *et al.*, 2009). P-values are indicated.

**Fig.S4**

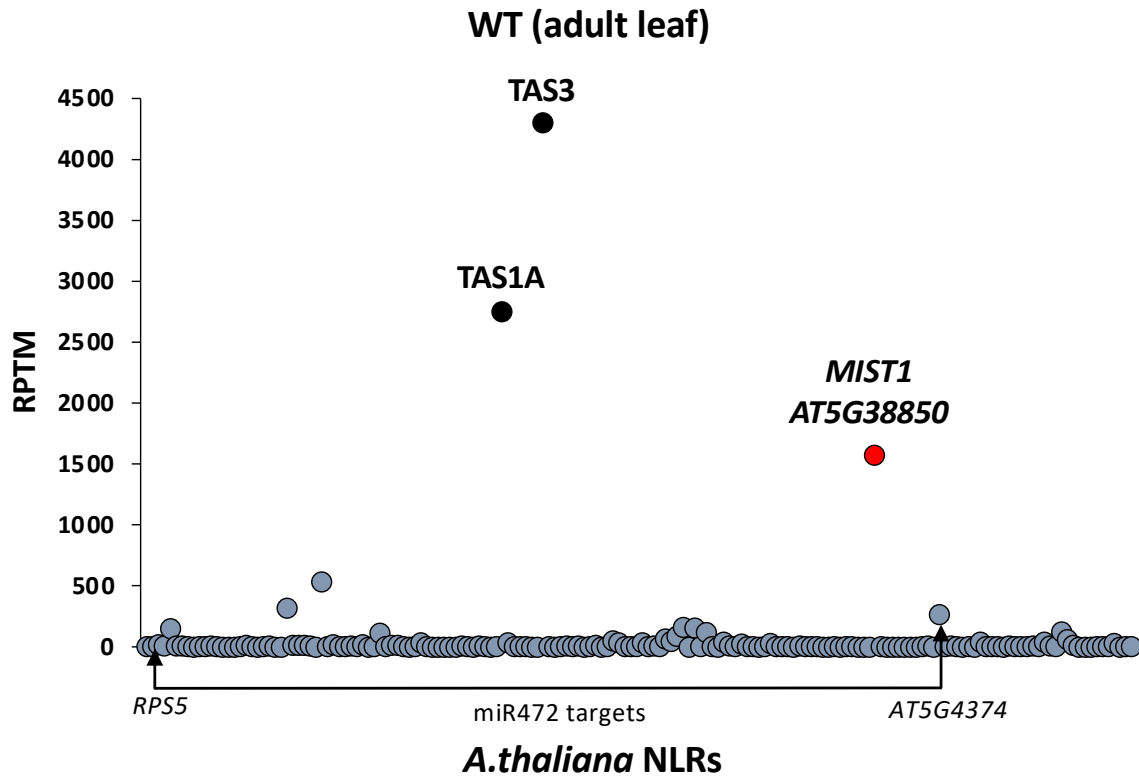

**Fig. S4** TNL-encoding *AT5G38850* gene accumulates more sRNAs than any other NLR in *Arabidopsis*. Graph shows sRNA accumulation from all NLRs within the *Arabidopsis* genome (data obtained from NCBI: BioProject SRP097592, WT library). Graph displays number of sRNA (reads per 10 million small RNAs mapped, RPTM) accumulated from each NLR-encoding gene. Arrows point to two miR472 target CNL genes. Number of sRNA accumulated from *TAS1A* and *TAS3* are provided as reference.

**Fig. S5**

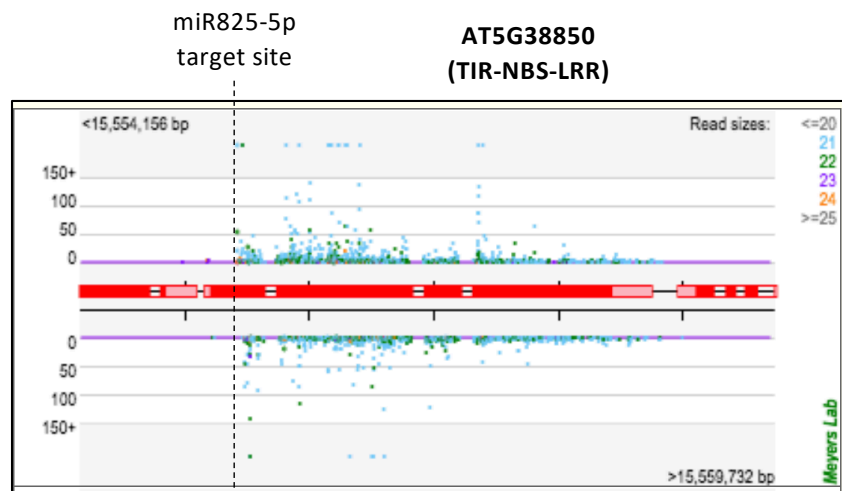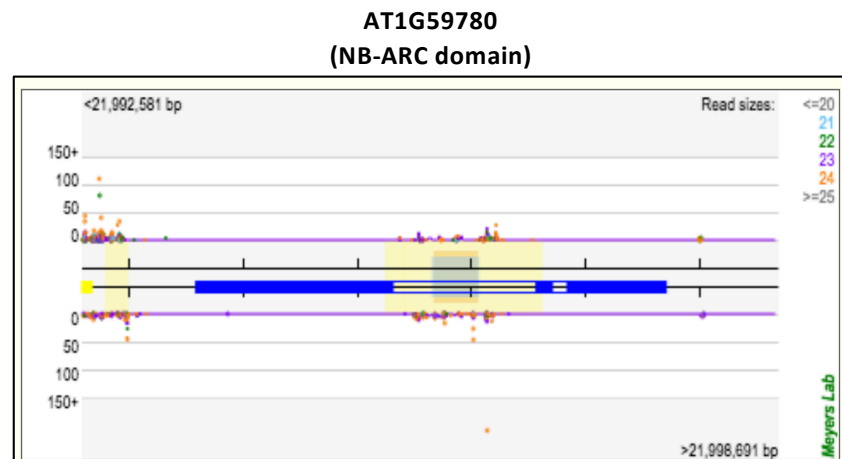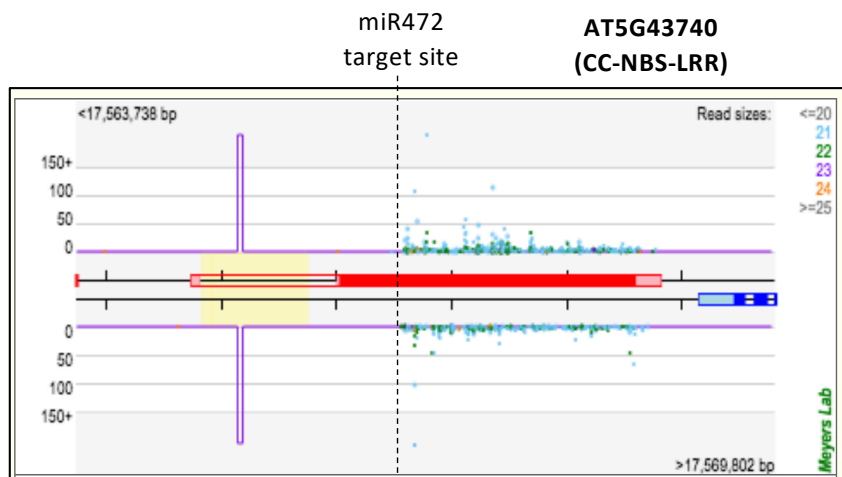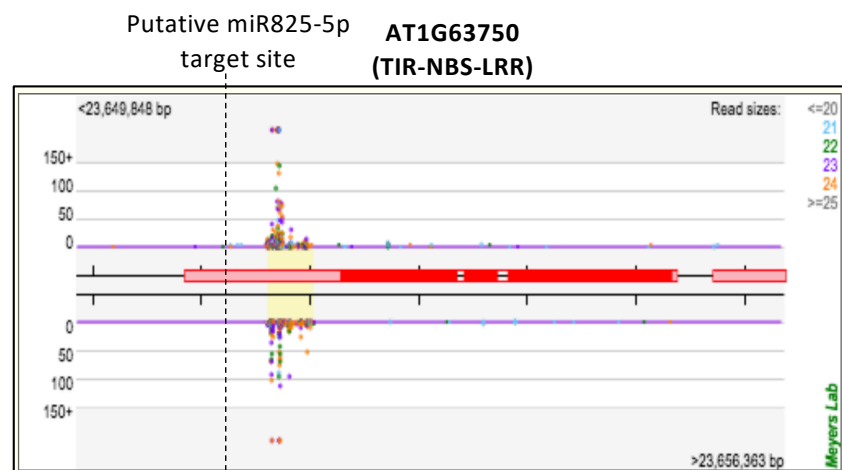

**AT4G16920  
(TIR-NBS-LRR)**

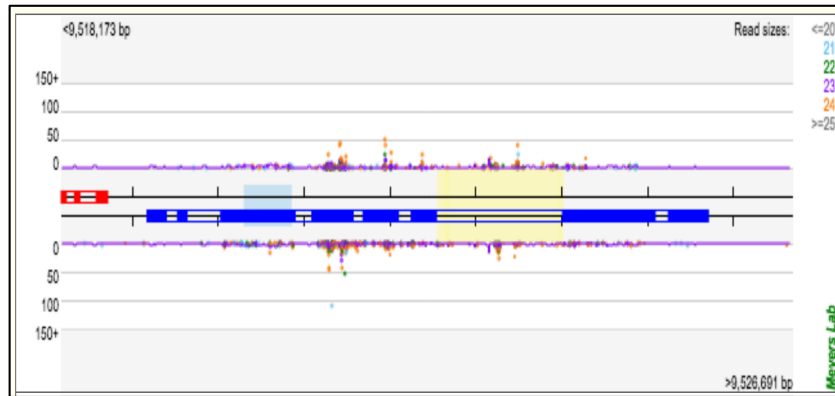

**AT4G16950  
(RPP5/TIR-NBS-LRR)**

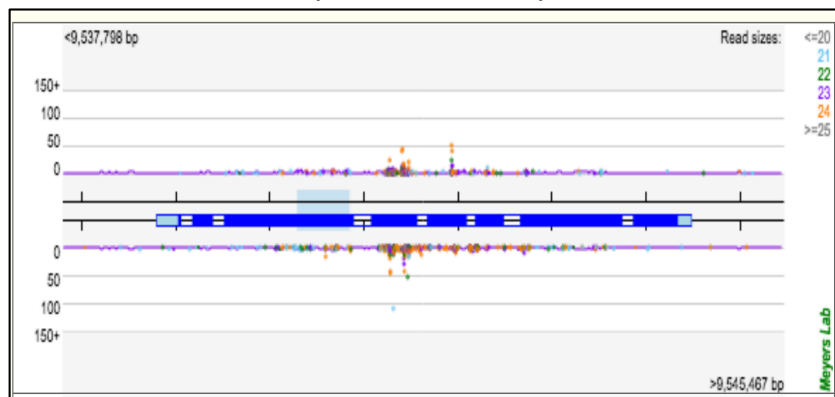

**AT5G47260  
(Putative Disease Resistance Protein)**

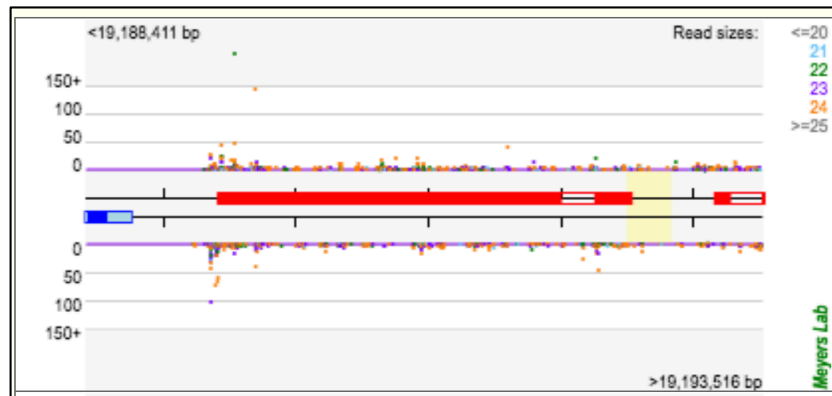

**AT4G16990  
(RLM3/TIR-NBS-LRR)**

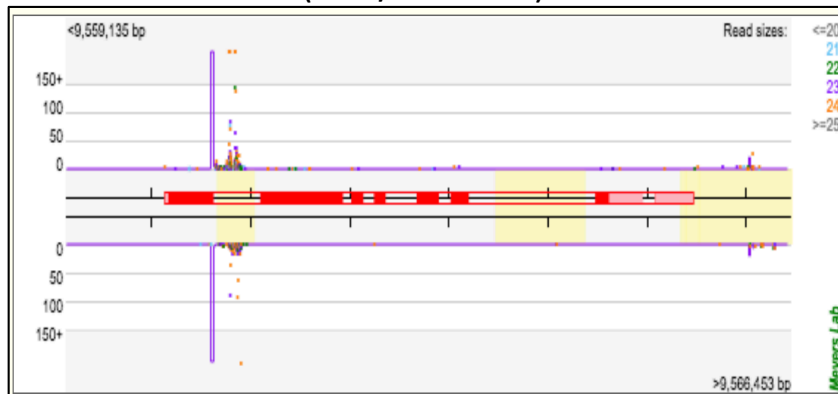

**AT1G58602  
(RPP7 fragment)**

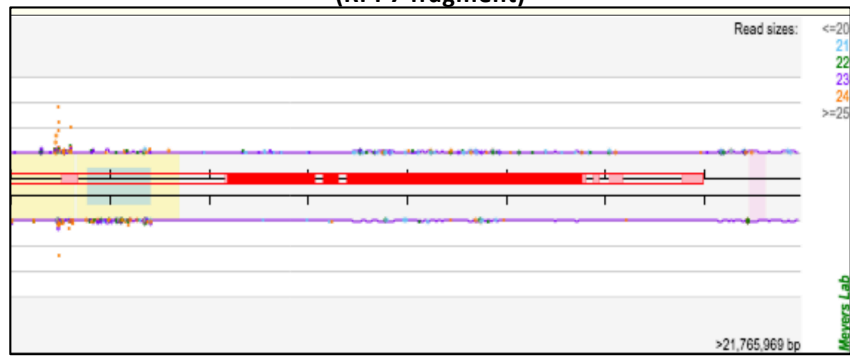

**Fig. S5 SiRNA production from different NLR genes.** Images show screenshots from MPSS showing sRNAs that originate from NLR genes in *Arabidopsis* selected among those displayed in Fig. 4B for accumulating the highest levels of sRNAs





**Fig. S6 MiRNA825-5p is a trigger for phasiRNAs production from *MIST1* transcripts.** **A** Predicted 3D-structure for the asymmetric duplex formed between miR825-5p and miR825-3p. Predictions were done using RNAfold and MC-fold/MC-Sym pipeline. **B** Sequence complementarity between miR825-5p and its target site in *MIST1*. Sequence matching the first sRNA that accumulates from this transcript is highlighted. Its position matches that predicted for the first phasiRNA (3'D1<sup>(+)</sup>) to be generated after cleavage by RISC-miR825-5p, between nucleotides 10 and 11. **C** Sequence and length of the sRNA highlighted in **B**. **D** Screenshot from MPSS showing sRNAs that accumulate from *MIST1* (*AT5G38850*). **E** Screenshot from MPSS showing the Phasing Analysis for the region analyzed in **D**. Each dot represents a window of ten cycles of sRNAs 21-nt in length, with the score for the degree of phasing indicated in the Y axis (scores calculated as described in (Howell *et al.*, 2007)). The red dot is the highest scoring window. Dots colored otherwise correspond to window in phase with the highest scoring (solid dots are exactly in phase, open dots are almost in phase [-1/+1]). Only 21-nt reads are considered for the analysis. **F** Predicted free energy for hybridization between miR825-5p and 3' target fragment/ 5' target fragment of *MIST1*. Prediction was done using UNAFold as previously described by (Branscheid *et al.*, 2015). **G** Quantification of sRNAs produced from *MIST1* as RPTM (Reads Per Ten Million) in two independent biological replicates in different plant mutant backgrounds.

**Fig. S7**

**Degradome-based Network  
(AGO1/2 associated sRNAs)**

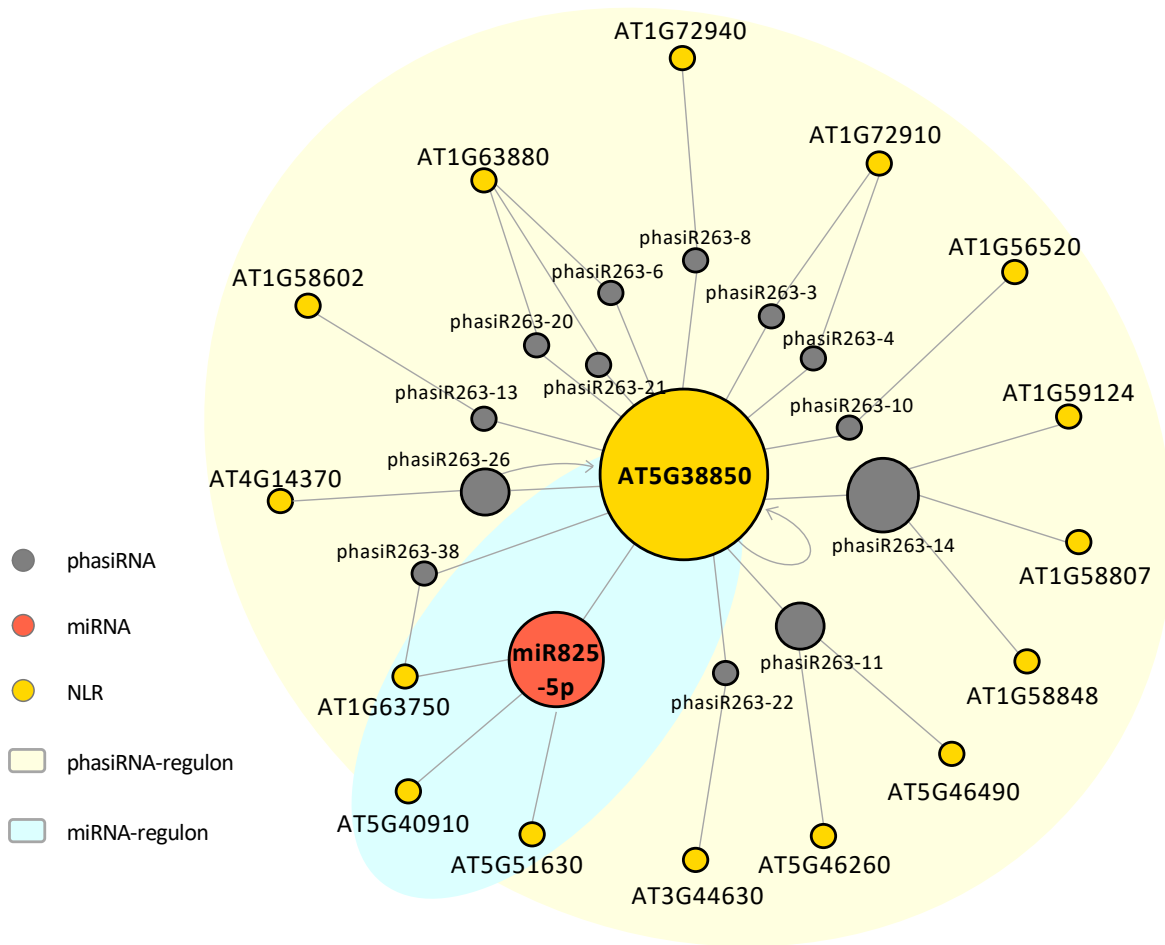

**Fig. S7 Regulatory network based on degradome data for miR825-5p and *MIST1*-derived miR825-5p-triggered phasiRNAs.** Network shows gene targeting based on the results detailed in Table 1, obtained following previously published reports (Zhai *et al.*, 2011; Deng *et al.*, 2018) using raw data from PARE libraries of Arabidopsis under basal conditions to look for degradome tags supporting phasiRNA targeting of TNL gene transcripts. Target genes represented include those for which tags significantly accumulated precisely map to predicted cleavage position within the phasiRNA matching sequence (Deng *et al.*, 2018) in at least two independent libraries, and after filtering out those with a peak category above 2. Size of signs indicating each phasiRNA.

**Fig. S8**

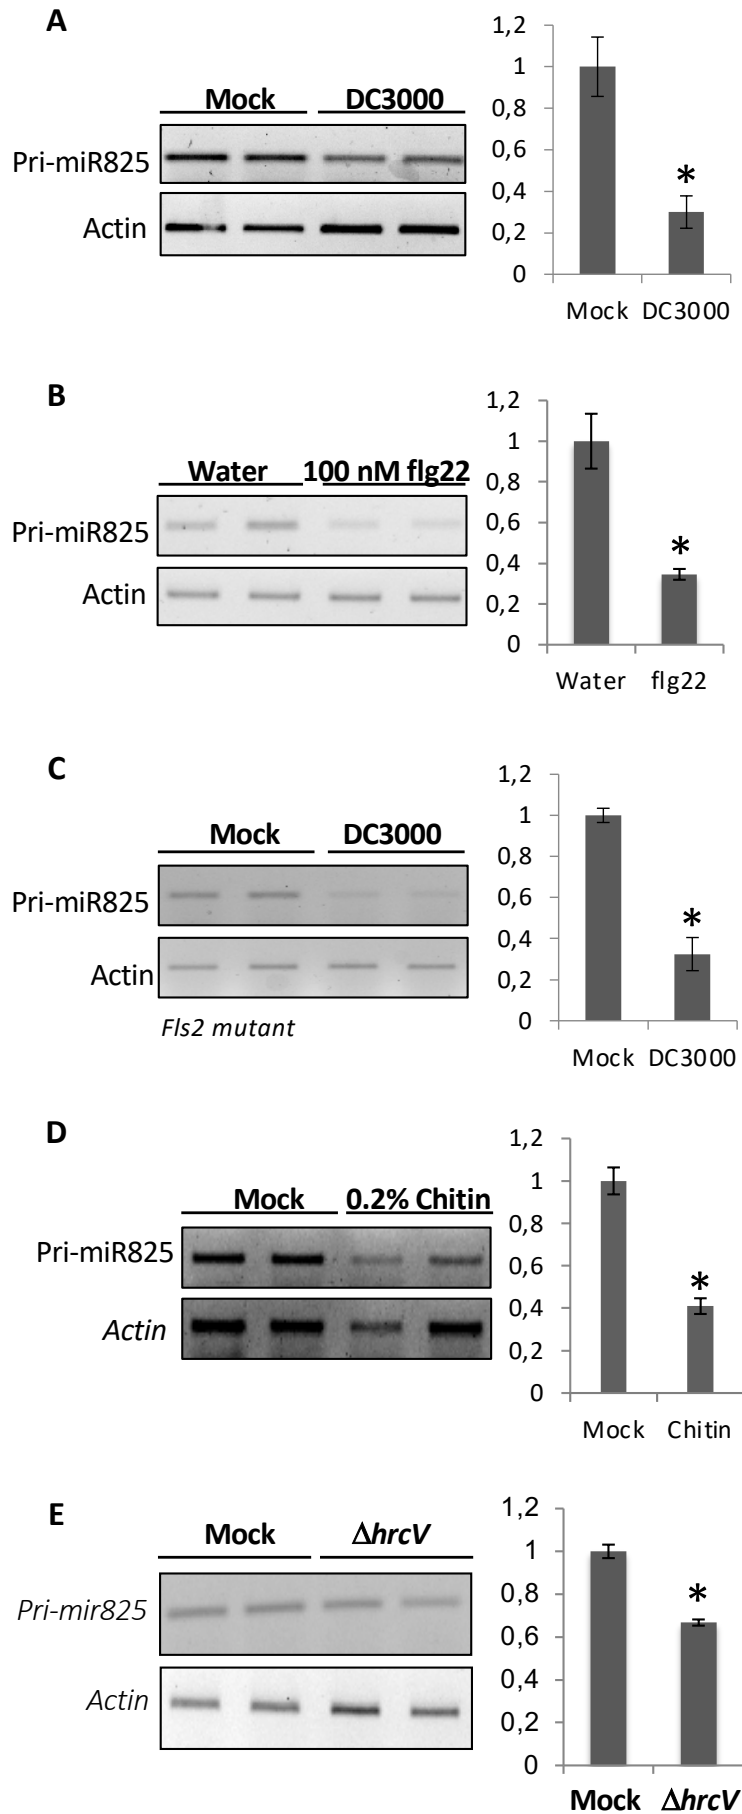

**Fig. S8 Pri-miR825 is downregulated by PAMPs.** A-D Semi quantitative RT-PCR show levels of pri-miR825 3 hours: **A** post-inoculation with  $5 \times 10^7$  CFU/ml of *P. syringae* DC3000. **B** post-treatment with flg22, **C** post-inoculation of *fls2* mutant plants with,  $5 \times 10^7$  CFU/ml of *P. syringae* DC3000, **D** post-treatment with chitin. Accompanying graphs correspond to Image J quantification of the bands relative to actin, and **E** post-inoculation with  $5 \times 10^7$  CFU/ml of *P. syringae* DC3000.

**Fig. S9**

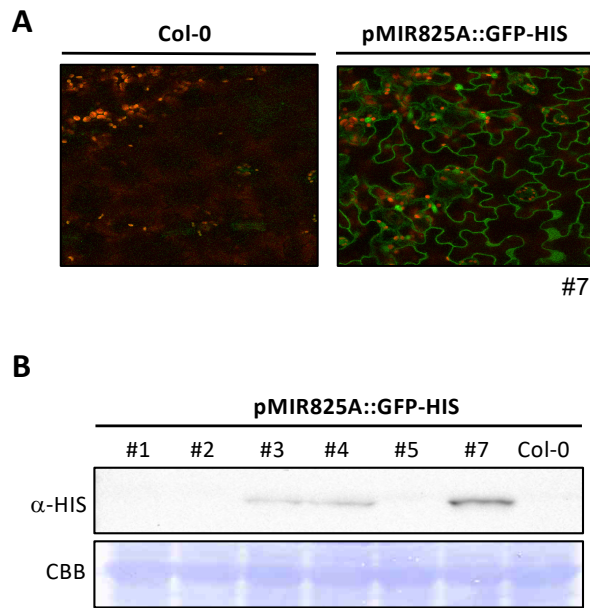

**Fig. S9 AtmiR825A promoter is active in adult leaves. A** Confocal microscopy images showing GFP accumulation in a transgenic line harbouring the reporter gene under the control of *AtmiR825* promoter (pMIR825A::GFP-HIS). **B** Western blot analysis using anti-HIS antibody show accumulation of the GFP-HIS reporter fusion protein in several transgenic lines harbouring the pMIR825A::GFP-HIS construct. The membrane was stained with Coomassie and used as loading control. Samples for **a** and **b** were taken from *Arabidopsis* adult leaves.

**Fig. S10**

**A**

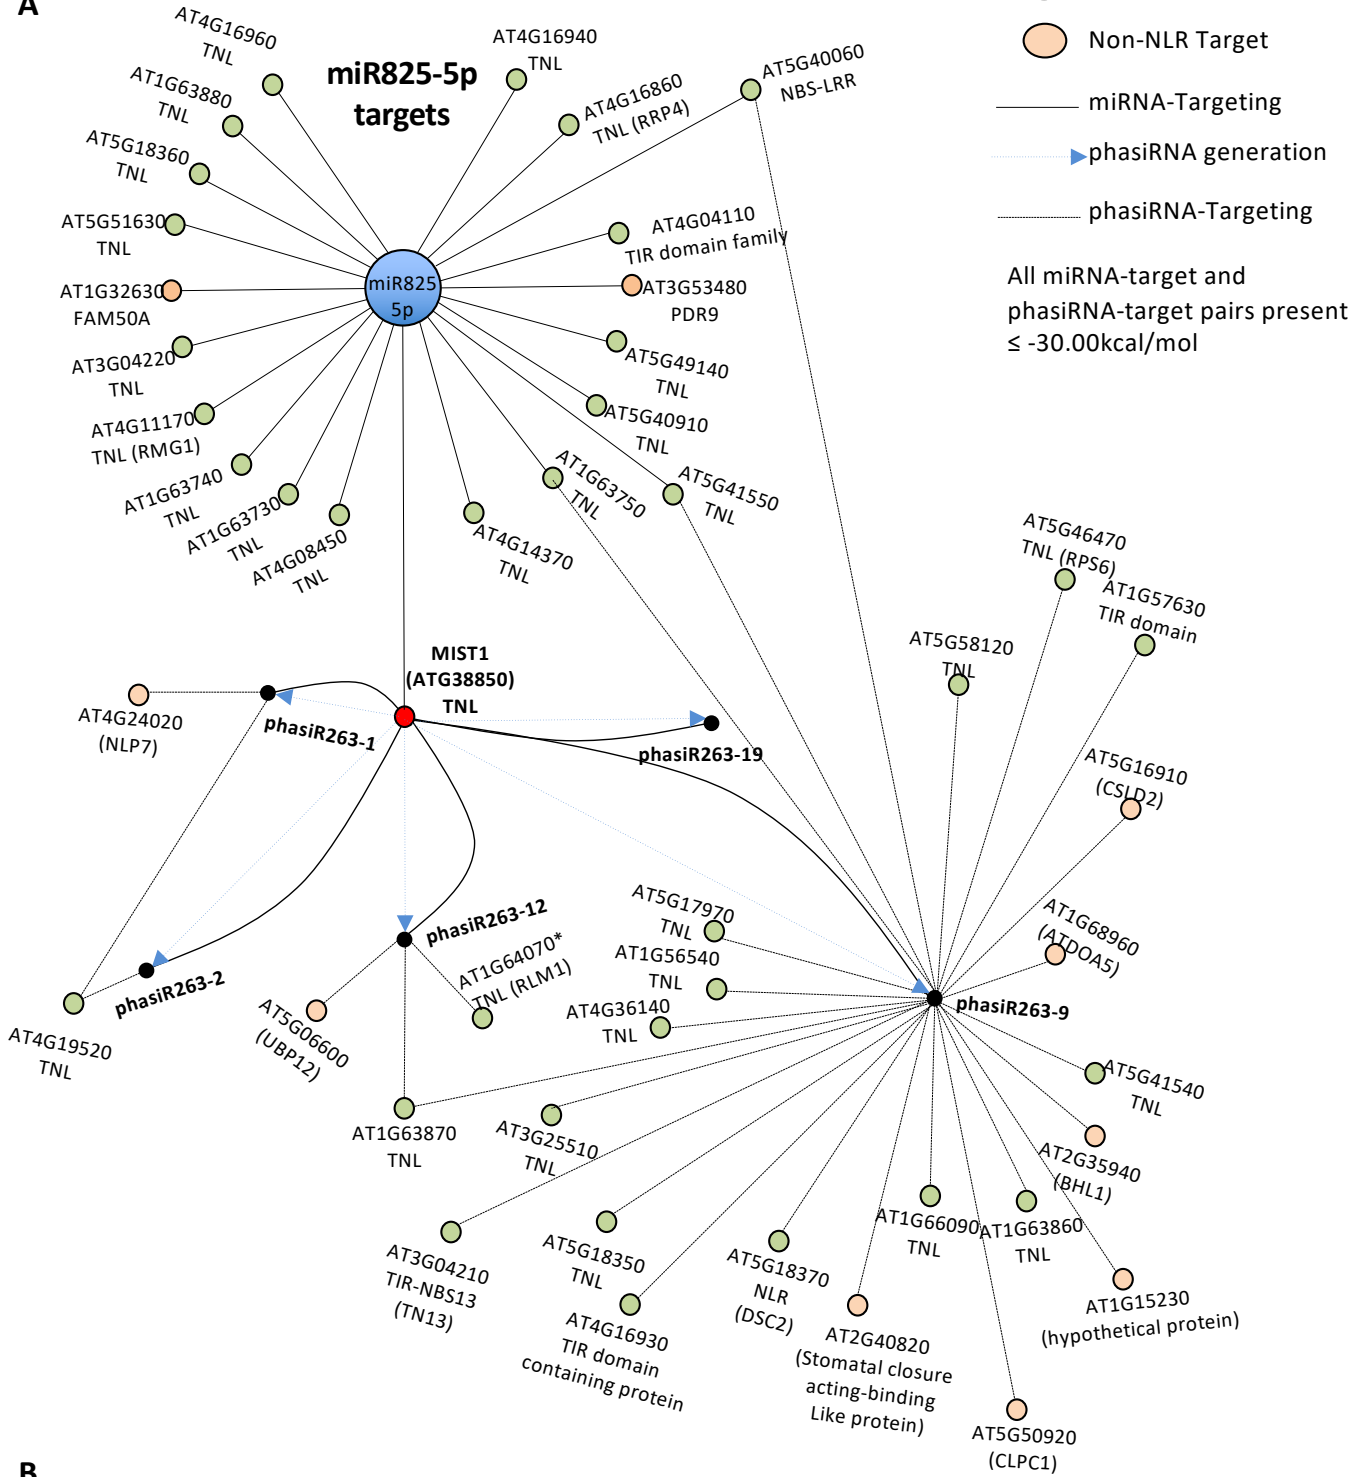

**B**

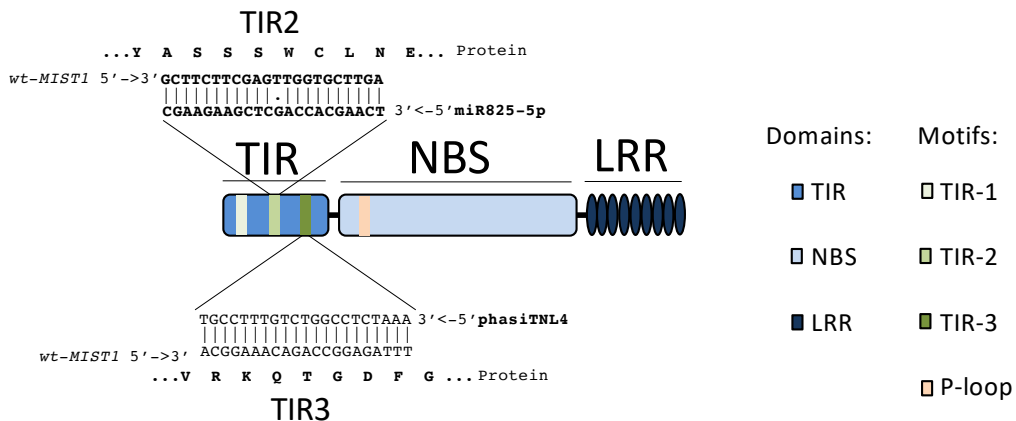

**Fig. S10 MiR825-5p predicted regulatory network.** **A** MiR825-5p direct target genes are shown including MIST1 as a primary central hub for TNL gene regulation. Only the top five phasiTNLs in terms of accumulation and AGO1/AGO2 association are included, as well as their predicted targets. Hits of this phasiTNLs on primary miR825-5p are also indicated. PhasiTNL4 acts as a secondary hub in this regulatory network through targeting of the highly conserved TIR3 motif. **B** Domain organization of a TNL protein with domains and conserved motifs indicated. Alignments of miR825-5p and phasiTNLs with their respective target sequences are mapped to the corresponding domains/motifs within the TNL protein.

**Table S1. Primers used in this study**

| Name                         | Sequence                                                          | Used to                                                          |
|------------------------------|-------------------------------------------------------------------|------------------------------------------------------------------|
| amiR825-5p-I                 | GATCAAGCACCACTCGAAGAAGCTCTCTCTTTGTATTCC                           | Increase levels of miR825-5p                                     |
| amiR825-5p-II                | GAGCTTCTCGAGCTGGTGCTTGATCAAAGAGAATCAATGA                          | Increase levels of miR825-5p                                     |
| amiR825-5p-III               | GAGCCTCTCGAGCTGTGCTTGATCACAGGTCGTGATATG                           | Increase levels of miR825-5p                                     |
| amiR825-5p-IV                | GATCAAGCACCACTCGAAGAAGGCTCTACATATATATTCCT                         | Increase levels of miR825-5p                                     |
| amiR-A                       | CTGCAAGGCGATTAAAGTTGGGTAAC                                        | For cloning amiRs                                                |
| amiR-B                       | GCGGATAACAATTTCAACAGGAAACAG                                       | For cloning amiRs                                                |
| STTM825-5p-F                 | AAGTTAACGCTTCTCGAGCCTATGGTCTTGAGTTGTTGTTATGGTCTAATTTAAATATGGTCT   | Reduce levels of miR825-5p                                       |
| STTM825-5p-R                 | TTGGATCCTCAAGCACCATAGGCTCGAAGAAGCATTCTCTCTTTAGACCATATTTAAATAGACCA | Reduce levels of miR825-5p                                       |
| amiR-anti825-I               | GATAAGCTTCTCGAGCTGGTCTTCTCTTTTGTATTCC                             | Reduce levels of Pri-miR825                                      |
| amiR-anti825-II              | GAAGCACCACTCGAAGAAGCTTATCAAAGAGAATCAATGA                          | Reduce levels of Pri-miR825                                      |
| amiR-anti825-III             | GAAGAACCAGCTCGATGAAGCTTATCACAGGTCGTGATATG                         | Reduce levels of Pri-miR825                                      |
| amiR-anti825-IV              | GATAAGCTTCTCGAGCTGGTCTTCTACATATATATTCCT                           | Reduce levels of Pri-miR825                                      |
| pro825-2kb-F                 | TAAAGCGCGCATGCTGTTTTCAATAAAGTTAATTC                               | For cloning the promoter of AthmicroRNA825A                      |
| pro825-2kb-R                 | AAGGCGCGCATATTTCTAAGATAAATAGCTAAGC                                | For cloning the promoter of AthmicroRNA825A                      |
| Pri-miR825-qPCR-F            | ACTCGTTCAAGCACCACTC                                               | Quantification of Pri-miR825                                     |
| Pri-miR825-qPCR-R            | CATCAACTTGTTCATGCACCTT                                            | Quantification of Pri-miR825                                     |
| MIST1-qPCR-F                 | GAGAGGAGCCAAACCATAGC                                              | Quantification of MIST1 (TIR-NBS-LRR)                            |
| MIST1-qPCR-R                 | TCGGCATCACTACGTCTTTCG                                             | Quantification of MIST1 (TIR-NBS-LRR)                            |
| Actin2-qPCR-F                | ACTAAAACGCAAACGAAAGCGGTT                                          | Quantification of Actin2/q-PCR normalization                     |
| Actin2-qPCR-F                | CTAAGCTCTCAAGATCAAAGGCTTA                                         | Quantification of Actin2/q-PCR normalization                     |
| Reverse-universal-stemloop q | GTGCAGGGTCCGAGGT                                                  | Quantification of miRNAs                                         |
| RT stem-loop miR825-5p       | GTGATATCCAGTGCAAGGTCGAGGATTTCGCACTGGATACGACGCTTCT                 | For pulsed RT and quantification of miR825-5p                    |
| miR825-5p stem-loop qPCR F   | TGGCTCAAGCACCACTCGA                                               | Quantification of miR825-5p                                      |
| U6 probe                     | GCTAATCTTCTGTATCGTTCC                                             | Northern blot loading control                                    |
| miR825-5p probe              | GCTTCTCGAGCTGGTCTTGA                                              | miR825-5p detection by Northern blot                             |
| MIST1_PhasiRNA_probeF        | TTTGAATGCAAAGACGTAG                                               | Generation of long probe for phasiRNA detection by northern blot |
| MIST1_PhasiRNA_probeR        | TTGGCGCCCTTTTCATATTTCTCTCTTCACTG                                  | Generation of long probe for phasiRNA detection by northern blot |
| MIGS825-5p-TS F              | AAGCGCCGCGCTTCTCGAGTTGGTCTTGATCTTCTCTAGCCGTGGTCGTC                | Generation of MIGS                                               |
| MIGS825-5p-TS R              | AAGGCGCCGCGCAATTTCTTCAAGCTATAT                                    | Generation of MIGS                                               |

**Supplementary Table 2.** ACT2 expression relative to UBQ5 in miR825-5p altered genotypes and statistical analysis.

| Genotype | Actin                    | Average    | SD         | SE          |
|----------|--------------------------|------------|------------|-------------|
| Col-0    | 1                        | 1.1707902  | 0.22872141 | 0.132052366 |
|          | 1.43064593<br>1.08172467 |            |            |             |
| STTM3    | 0.76666417               | 1.0331889  | 0.62301204 | 0.35969617  |
|          | 1.74512858               |            |            |             |
|          | 0.58777395               |            |            |             |
| STTM4    | 0.88679139               | 0.90642159 | 0.05252678 | 0.030326352 |
|          | 0.96593633               |            |            |             |
|          | 0.86653705               |            |            |             |
| OX3      | 1.104454                 | 1.72603044 | 0.54528755 | 0.314821912 |
|          | 1.94980971               |            |            |             |
|          | 2.12382761               |            |            |             |
| OX12     | 0.80478017               | 0.76629047 | 0.05585885 | 0.032250119 |
|          | 0.79186881               |            |            |             |
|          | 0.70222244               |            |            |             |

| ANOVA summary                             |           |
|-------------------------------------------|-----------|
| F                                         | 2.764     |
| P value                                   | 0.0876    |
| P value summary                           | ns        |
| Significant diff. among means (P < 0.05)? | <b>NO</b> |
| R square                                  | 0.5251    |

| Tukey's multiple comparisons test | Mean Diff. | 95.00% CI of diff. | Significant? | Summary | Adjusted P Value |
|-----------------------------------|------------|--------------------|--------------|---------|------------------|
| Col-0 vs. STTM3                   | 0.1376     | -0.8987 to 1.174   | <b>NO</b>    | ns      | 0.9912           |
| Col-0 vs. STTM4                   | 0.2644     | -0.7720 to 1.301   | <b>NO</b>    | ns      | 0.9121           |
| Col-0 vs. OX3                     | -0.5552    | -1.592 to 0.4811   | <b>NO</b>    | ns      | 0.4423           |
| Col-0 vs. OX12                    | 0.4045     | -0.6318 to 1.441   | <b>NO</b>    | ns      | 0.7058           |
| STTM3 vs. STTM4                   | 0.1268     | -0.9096 to 1.163   | <b>NO</b>    | ns      | 0.9936           |
| STTM3 vs. OX3                     | -0.6928    | -1.729 to 0.3435   | <b>NO</b>    | ns      | 0.2544           |
| STTM3 vs. OX12                    | 0.2669     | -0.7694 to 1.303   | <b>NO</b>    | ns      | 0.9093           |
| STTM4 vs. OX3                     | -0.8196    | -1.856 to 0.2167   | <b>NO</b>    | ns      | 0.1431           |
| STTM4 vs. OX12                    | 0.1401     | -0.8962 to 1.176   | <b>NO</b>    | ns      | 0.9906           |
| OX3 vs. OX12                      | 0.9597     | -0.07659 to 1.996  | <b>NO</b>    | ns      | 0.0729           |



**Supplementary Table 3.** ACT2 expression relative to UBQ5 after flg22 treatment and statistical analysis.

| Treatment | Actin                                                | Average   | SD       | SE      | t-test P value | P value summary | Significantly different (P < 0.05)? |
|-----------|------------------------------------------------------|-----------|----------|---------|----------------|-----------------|-------------------------------------|
| Mock 0 h  | 0.41561895<br>1                                      | 0.65895   | 0.304199 | 0.17563 | 0.1942         | ns              | <b><u>NO</u></b>                    |
| Flg22 0 h | 0.56123102<br>0.82074161<br>0.97490486<br>1.0693     | 0.9549822 | 0.125471 | 0.07244 |                |                 |                                     |
| Mock 3 h  | 1<br>1.21139274                                      | 1.0822192 | 0.113249 | 0.06538 | 0.3916         | ns              | <b><u>NO</u></b>                    |
| Flg22 3 h | 1.03526492<br>0.44084192<br>0.9794203<br>1.17012825  | 0.8634635 | 0.378218 | 0.21836 |                |                 |                                     |
| Mock 6 h  | 1<br>1.50350882                                      | 1.1744474 | 0.285148 | 0.16463 | 0.2832         | ns              | <b><u>NO</u></b>                    |
| Flg22 6 h | 1.01983329<br>1.17419064<br>0.62057035<br>0.87559361 | 0.8901182 | 0.277096 | 0.15998 |                |                 |                                     |
| Mock 14 h | 1<br>2.3456699                                       | 1.7119067 | 0.67623  | 0.39042 | 0.0636         | ns              | <b><u>NO</u></b>                    |
| Flg22 14h | 1.79005014<br>0.61985385<br>0.75262337<br>0.76136844 | 0.7112819 | 0.0793   | 0.04578 |                |                 |                                     |

**Table S4. Antibodies used in this work**

| <b>Antibody</b> | <b>Working dilution</b> | <b>Reference</b>              |
|-----------------|-------------------------|-------------------------------|
| anti-GFP        | 1:600                   | Santa Cruz Biotechnology, USA |
| anti-Tubulin    | 1:1000                  | Abiocode M0267                |
| anti-MPKs       | 1:5000                  | Cell Signaling Biotech #4370  |
| anti-PR1        | 1:5000                  | (Wang <i>et al.</i> , 2005)*  |
| anti-Rabbit     | 1:10000                 | SIGMA A6154                   |
| anti-Mouse      | 1:80000                 | SIGMA A9044                   |

\*Wang D, Weaver ND, Kesarwani M, Dong X. 2005. Induction of protein secretory pathway is required for systemic acquired resistance. *Science* 308(5724): 1036-1040.

**Table S5. Bacterial strains used in this work**

| Strain                                                                         | Reference                             | Antibiotic selection*                                                                                                                                                                                   |
|--------------------------------------------------------------------------------|---------------------------------------|---------------------------------------------------------------------------------------------------------------------------------------------------------------------------------------------------------|
| <i>Pseudomonas syringae</i> pv. tomato DC3000                                  | Cuppels, 1986 <sup>1</sup>            |                                                                                                                                                                                                         |
| <i>Pseudomonas syringae</i> pv. tomato DC3000 constitutively expressing AvrPt2 | Macho <i>et al.</i> 2009 <sup>2</sup> | 15 µg/ml kanamycin (pAME)                                                                                                                                                                               |
| <i>Agrobacterium tumefaciens</i> C58C1                                         | Deblaere <i>et al.</i> 1985           | 50 µg/ml rifampicin (genomic)<br>5 µg/ml tetracycline (helper plasmid PGV2260)<br>50 µg/ml kanamycin (pGWB2, pBINX)<br>40 µg/ml hygromycin (pGWB2, pMDC111)                                             |
| <i>Agrobacterium tumefaciens</i> GV3101                                        | Koncz <i>et al.</i> 1994              | 50 µg/ml rifampicin (genomic)<br>5 µg/ml tetracycline (helper plasmid pSOUP)<br>50 µg/ml kanamycin (pGWB2, pBINX)<br>40 µg/ml hygromycin (pGWB2, pMDC111)<br>20 µg/ml gentamycin (helper plasmid pMP90) |

\*Genomic resistance or plasmid resistance when indicated

<sup>1</sup>Cuppels, D. A. 1986. Generation and Characterization of Tn5 Insertion Mutations in *Pseudomonas syringae* pv. tomato. Appl. Environ. Microbiol. 51:323-327.

<sup>2</sup>Macho AP, Ruiz-Albert J, Tornero P, Beuzón CR. 2009 Identification of new type III effectors and analysis of the plant response by competitive index. Mol Plant Pathol. 10:69–80.

<sup>3</sup>Deblaere R, Bytebier B, De Greve H, Deboeck F, Schell J, Van Montagu M, et al. 1985 Efficient octopine Ti plasmid-derived vectors for *Agrobacterium*-mediated gene transfer to plants. Nucleic Acids Res.13:4777–88.

<sup>4</sup>Koncz C., Martini N., Szabados L., Hroudá M., Bachmair A., Schell J. (1994) Specialized vectors for gene tagging and expression studies. In: Gelvin S.B., Schilperoort R.A. (eds) Plant Molecular Biology Manual. Springer, Dordrecht.

**Table S6. Plasmids generated/used in this study**

| Plasmid            | Cloned                                                                | Used to                                                                              | Promoter | Plant Resistance |
|--------------------|-----------------------------------------------------------------------|--------------------------------------------------------------------------------------|----------|------------------|
| pGEM-T             | amiR825-5p                                                            | Cloning of amiR825-5p                                                                | -        | -                |
| pBINX <sup>+</sup> | amiR825-5p                                                            | Increases levels of miRNA825-5p (22nt)                                               | 35S      | Km               |
| pBINX <sup>+</sup> | amiR319                                                               | Increases levels of miR319                                                           | 35S      | Km               |
| pBINX <sup>+</sup> | STTM825-5p                                                            | Reduce levels of miRNA825-5p (22nt)                                                  | 35S      | Km               |
| pBINX <sup>+</sup> | Empty Vector                                                          | Control                                                                              | 35S      | Km               |
| pBSKII             | anti-825                                                              | Cloning of anti-825                                                                  | -        | -                |
| pBINX <sup>+</sup> | anti-825                                                              | Reduce levels of Pri-miR825                                                          | 35S      | Km               |
| pENTR              | microRNA825A 2kb promoter                                             | Cloning of microRNA825A 2kb promoter                                                 | -        | -                |
| pMDC111            | microRNA825A 2kb promoter                                             | Reporter of microRNA825A promoter activity with GFP                                  | -        | Hyg              |
| pENTR              | <i>AT5GG38850</i> genomic region                                      | Cloning of <i>AT5GG38850</i> genomic region                                          | -        | -                |
| PEG103             | <i>AT5GG38850</i> genomic region                                      | Increases levels of <i>AT5GG38850</i> fused to GFP                                   | 35S      | Basta            |
| pENTR              | <i>AT5GG38850</i> genomic region with a mutated miR825-5p target site | Cloning of <i>AT5GG38850</i> genomic region with a mutated miR825-5p target site     | -        | -                |
| PEG103             | <i>AT5GG38850</i> genomic region with a mutated miR825-5p target site | Increases levels of a miR825-5p resistant version of <i>AT5GG38850</i> fused to GFP  | 35S      | Basta            |
| pENTR              | MIGS825-5p-TS                                                         | Cloning of MIGS825-5p-TS                                                             | -        | -                |
| pGW82              | MIGS825-5p-TS                                                         | Produce a fusion between miR825-5p Target site and a fragment of <i>AGAMOUS</i> gene | 35S      | Km and Hyg       |

**Table S7. Transgenic lines used in this study**

| <b>Transgenic lines (<i>A. thaliana</i>)</b> | <b>Plasmid used</b> | <b>Plant resistance/selection</b> | <b>Description</b>                                                                                      |
|----------------------------------------------|---------------------|-----------------------------------|---------------------------------------------------------------------------------------------------------|
| amiR anti-825                                | pBINX'              | Km                                | Transgenic line expressing an artificial miRNA (amiR) against Pri-miR825                                |
| amiR825-5p                                   | pBINX'              | Km                                | Transgenic line that increase miR825-5p levels                                                          |
| STTM825-5p                                   | pBINX'              | Km                                | Transgenic line that reduce miR825-5p levels                                                            |
| MIGS825-5p-TS                                | pGWB2               | Km/Hyg                            | Transgenic line harbouring a fusion between miR825-5p Target site and a fragment of <i>AGAMOUS</i> gene |
| MIGS825-5p-TS x amiR825-5p                   | pGWB2/pBINX'        | Km/Hyg                            | Cross between both transgenic line described above                                                      |
| Pro825::GFP                                  | pMDC111             | Hyg                               | Transgenic line harbouring a phusion between miR825 promoter and GFP reporter                           |

**Table S8. Software used in this work**

| <b>Software</b>           | <b>Purpose</b>                                                        | <b>Data source</b>                                     | <b>Parameters</b>                                                               | <b>Reference</b>                                                                                                                  |
|---------------------------|-----------------------------------------------------------------------|--------------------------------------------------------|---------------------------------------------------------------------------------|-----------------------------------------------------------------------------------------------------------------------------------|
| SRA toolkit<br>fastq-dump | Raw file retrieval<br>and conversion to<br>fastq files                | Sequence<br>Read Archive<br>(NCBI)                     | Standard/default parameters                                                     | <a href="http://ncbi.github.io/sra-tools/">http://ncbi.github.io/sra-tools/</a>                                                   |
| Trimmomatic               | Quality filtered<br>applied for adapter<br>removal                    | Fastq files<br>obtained<br>using fastq-<br>dump        | Standard/default parameters                                                     | (Bolger <i>et al.</i> , 2014) <sup>1</sup>                                                                                        |
| FASTQC                    | Quality<br>confirmation                                               | Fastq files<br>quality-<br>filetered by<br>Trimmomatic | Standard/default parameters                                                     | <a href="http://www.bioinformatics.babraham.ac.uk/projects/fastqc/">http://www.bioinformatics.babraham.ac.uk/projects/fastqc/</a> |
| Bowtie                    | Mapping of reads<br>to Arabidopsis<br>genome (TAIR10).<br>SAM output. | Reads from<br>FASTQC-<br>confirmed<br>fastq files      | No mismatches (-v 0 mode),<br>except for AGO1 and AGO2<br>libraries (-v 1 mode) | (Langmead <i>et al.</i> , 2009) <sup>2</sup>                                                                                      |

|                   |                                                                                 |                                     |                                                                                        |                                                                                                                                                                                                                           |
|-------------------|---------------------------------------------------------------------------------|-------------------------------------|----------------------------------------------------------------------------------------|---------------------------------------------------------------------------------------------------------------------------------------------------------------------------------------------------------------------------|
| samtools          | Conversion to BAM, sorting and indexing                                         | SAM files                           | Standard/default parameters                                                            | (Li <i>et al.</i> , 2009) <sup>3</sup>                                                                                                                                                                                    |
| IGV browser       | Reads visualization                                                             | Sorted and indexed BAM files        | Standard/default parameters                                                            | (Robinson <i>et al.</i> , 2011) <sup>4</sup>                                                                                                                                                                              |
| HTSeq htseq-count | Estimating numbers of reads mapped per feature of the <i>A. thaliana</i> genome | SAM and GFF files                   | Normalization to ten millions of total reads mapped to the entire genome (RPTM method) | (Anders <i>et al.</i> , 2015) <sup>5</sup>                                                                                                                                                                                |
| strucVis          | Display small RNA coverage and secondary structure of ath-miR825 precursor      | Raw reads retrieved from SRR2079800 | Standard/default parameters                                                            | <a href="https://github.com/MikeAxtell/strucVis">https://github.com/MikeAxtell/strucVis</a>                                                                                                                               |
| WMD3              | microRNA and siRNA target prediction                                            | miRNA / siRNA fasta files           | Standard/default parameters                                                            | ( <a href="http://wmd3.weigelworld.org/cgi-bin/webapp.cgi">http://wmd3.weigelworld.org/cgi-bin/webapp.cgi</a> ; Ossowski Stephan, Fitz Joffrey, Schwab Rebecca, Riester Markus and Weigel Detlef, personal communication) |

|                             |                                            |                                                                                                   |                                                                            |                                                                                                            |
|-----------------------------|--------------------------------------------|---------------------------------------------------------------------------------------------------|----------------------------------------------------------------------------|------------------------------------------------------------------------------------------------------------|
| psRNATarget                 | microRNA and siRNA target prediction       | miRNA / siRNA fasta files                                                                         | Standard/default parameters                                                | (Dai & Zhao, 2011) <sup>6</sup>                                                                            |
| Clustal Omega               | To analyze miRNA825 conservation           | Sequences retrieved from miRBase or NCBI (Blastn against the genomes with ath-miR825 as template) | Standard/default parameters                                                | (Madeira <i>et al.</i> , 2019) <sup>7</sup><br>miRBase (Griffiths-Jones <i>et al.</i> , 2006) <sup>8</sup> |
| Weblogo                     | Generation of logos                        | NLR sequences were retrieved from TAIR                                                            | Standard/default parameters                                                | (Crooks <i>et al.</i> , 2004) <sup>9</sup>                                                                 |
| “grep” UNIX / Linux command | Determination of 5p and 3p read number for | Raw files obtained from                                                                           | Only reads starting with mature miRNA sequences and containing the adapter | N/A                                                                                                        |



|             |                                                                               |                                                                                                                         |                                                                                                                                                                                                                                                                               |                                                                                                                                                                          |
|-------------|-------------------------------------------------------------------------------|-------------------------------------------------------------------------------------------------------------------------|-------------------------------------------------------------------------------------------------------------------------------------------------------------------------------------------------------------------------------------------------------------------------------|--------------------------------------------------------------------------------------------------------------------------------------------------------------------------|
|             | calculation of miR825 5p/3p ratios.                                           | Sequence Read Archive (NCBI) under the accession numbers listed in <b>Table S6</b> , converted to fastq files           | sequence immediately after miRNA reads were used. Ratios were calculated for each library                                                                                                                                                                                     |                                                                                                                                                                          |
| CleaveLand4 | Degradome analyses against <i>Arabidopsis thaliana</i> cDNA NLR-transcriptome | Four degradome libraries ( <b>Table S6</b> ) analyzed against AGO-bound sRNAs. Just sRNAs with $\geq 5$ of mapped reads | Bowtie parameters for modified to -v 0 [no mismatch allowed] and -k 10 [report up to 10 valid alignments] during alignment. Output was filtered retaining only degradome categories 0-2 and Allen scores 0-6.<br><br>Only sRNA-NLR interactions detected in at least 2 of the | (Addo-Quaye <i>et al.</i> , 2009) <sup>10</sup><br>Output filtering (Gyula <i>et al.</i> , 2018) <sup>11</sup><br>Ws/Wl ratios (Zhai <i>et al.</i> , 2011) <sup>12</sup> |

|                  |                                                          |                            |                                                                                                                                                                                                                                                    |                                                                                                                                                     |
|------------------|----------------------------------------------------------|----------------------------|----------------------------------------------------------------------------------------------------------------------------------------------------------------------------------------------------------------------------------------------------|-----------------------------------------------------------------------------------------------------------------------------------------------------|
|                  |                                                          | were used in the analysis. | libraries were considered significant.<br><br>Ws/Wl ratios: number of PARE reads within a small window (5 nt $\pm$ 2) divided by the number of reads within a large window (31 nt $\pm$ 15), considered as validated when equal or larger than 0.5 |                                                                                                                                                     |
| Mfold            | Prediction of secondary RNA structure and Vienna format. | fastq file                 | Standard/default parameters                                                                                                                                                                                                                        | (Zuker, 2003) <sup>13</sup>                                                                                                                         |
| Varna            | Visualization of secondary RNA structure                 | Vienna format              | Standard/default parameters                                                                                                                                                                                                                        | (Darty <i>et al.</i> , 2009) <sup>14</sup>                                                                                                          |
| Mfold, RNAhybrid | Prediction of secondary and tertiary structures          | Fasta                      | Standard/default parameters                                                                                                                                                                                                                        | Mfold (Zuker, 2003) <sup>13</sup><br>RNAhybrid (Krüger <i>et al.</i> , 2006) <sup>15</sup><br>MC-fold/MC-sym (Parisien & Major, 2008) <sup>16</sup> |

|                    |                                    |  |  |                                                                 |
|--------------------|------------------------------------|--|--|-----------------------------------------------------------------|
| and MC-fold/MC-Sym | for the miR8255-p/miR825-3p duplex |  |  | Overall pipeline (Manavella <i>et al.</i> , 2012) <sup>17</sup> |
|--------------------|------------------------------------|--|--|-----------------------------------------------------------------|

<sup>1</sup>Bolger AM, Lohse M, Usadel B. 2014 Trimmomatic: a flexible trimmer for Illumina sequence data. *Bioinformatics* 30:2114–20.

<sup>2</sup>Langmead B, Trapnell C, Pop M, Salzberg SL. Ultrafast and memory-efficient alignment of short DNA sequences to the human genome. *Genome Biol.* 2009; 10:R25–10.

<sup>3</sup>Li H, Handsaker B, Wysoker A, Fennell T, Ruan J, Homer N, et al. 2009 The Sequence Alignment/Map format and SAMtools. *Bioinformatics.* 25:2078–9.

<sup>4</sup>Robinson JT, Thorvaldsdóttir H, Winckler W, Guttman M, Lander ES, Getz G, et al. 2011 Integrative genomics viewer. *Nat Biotechnol.* 29:24–6.

<sup>5</sup>Anders S, Pyl PT, Huber W. 2015 HTSeq--a Python framework to work with high-throughput sequencing data. *Bioinformatics.* 31:166–9.

<sup>6</sup>Dai X, Zhao PX. 2011 psRNATarget: a plant small RNA target analysis server. *Nucleic Acids Res.* 39:W155–9.

<sup>7</sup>Madeira F, Park YM, Lee J, Buso N, Gur T, Madhusoodanan N, et al. 2019 The EMBL-EBI search and sequence analysis tools APIs in 2019. *Nucleic Acids Res.* 47:W636–41.

<sup>8</sup>Griffiths-Jones S, Grocock RJ, van Dongen S, Bateman A, Enright AJ. 2006 miRBase: microRNA sequences, targets and gene nomenclature. *Nucleic Acids Res.* 34:D140–4.

<sup>9</sup>Crooks GE, Hon G, Chandonia J-M, Brenner SE. 2004 WebLogo: a sequence logo generator. *Genome Res;* 14:1188–90.

<sup>10</sup>Addo-Quaye C, Miller W, Axtell MJ. 2009. CleaveLand: a pipeline for using degradome data to find cleaved small RNA targets. *Bioinformatics* 25: 130–131.

<sup>11</sup>Gyula P, Baksa I, Tóth T, Mohorianu I, Dalmay T, Szittyá G. 2018. Ambient temperature regulates the expression of a small set of sRNAs influencing plant development through NF- YA2and YUC2. *Plant, Cell & Environment* 41: 2404–2417.

<sup>12</sup>Zhai J, Jeong DH, De Paoli E, Park S, Rosen BD, Li Y, Gonzalez AJ, Yan Z, Kitto SL, Grusak MA, Jackson SA, Stacy G, Cook DR, Green PJ, Sherrier DJ, Meyers BC. 2011. MicroRNAs as master regulators of the plant NB-LRR defense gene family via the production of phased, trans-acting siRNAs. *Genes & Development* 25: 2540–2553.

<sup>13</sup>Zuker M. 2003. Mfold web server for nucleic acid folding and hybridization prediction. *Nucleic Acids Research* 31: 3406–3415.

<sup>14</sup>Darty K, Denise A, Ponty Y. 2009. VARNA: Interactive drawing and editing of the RNA secondary structure. *Bioinformatics* 25: 1974–1975.

<sup>15</sup>Kruger J, & Rehmsmeier M (2006). RNAhybrid: microRNA target prediction easy, fast and flexible. *Nucleic Acids Res,* 34, W451-4.

<sup>16</sup>Parisien M, Major F. The MC-Fold and MC-Sym pipeline infers RNA structure from sequence data. *Nature.* 2008 Mar 6;452(7183):51-5. doi: 10.1038/nature06684. PMID: 18322526.

<sup>17</sup>Manavella PA, Koenig D, Weigel D. 2012. Plant secondary siRNA production determined by microRNA-duplex structure. Proceedings of the National Academy of Sciences of the United States of America 109: 2461–2466.

**Table S9: Libraries used in this work**

| Accession number                                                                                                                                                                                 | Description                                                                                                                                                                                                                                |
|--------------------------------------------------------------------------------------------------------------------------------------------------------------------------------------------------|--------------------------------------------------------------------------------------------------------------------------------------------------------------------------------------------------------------------------------------------|
| GSM2787769<br>GSM2787770<br>GSM3909547<br>GSM3909548                                                                                                                                             | <b>AGO1/AGO2-loaded small RNA IP libraries</b>                                                                                                                                                                                             |
| SRR1171802<br>SRR1171803<br>SRR1171804<br>SRR10322040                                                                                                                                            | <b>Degradome libraries</b><br>[dataset]. <i>Arabidopsis thaliana</i> , omics_ena_project, V1; 1970.<br><a href="https://www.ncbi.nlm.nih.gov/bioproject/?term=PRJNA238653">https://www.ncbi.nlm.nih.gov/bioproject/?term=PRJNA238653</a> . |
| SRR2079799<br>SRR2079800<br>SRR2079801<br>SRR2079802<br>SRR2079803<br>SRR2079804<br>SRR2079805<br>SRR2079806<br>SRR2079807<br>SRR2079808<br>SRR2079809<br>SRR2079810<br>SRR2079811<br>SRR2079812 | <b>Sequence Read Archive (NCBI) files used to determine miR825 5p/3p ratios</b><br>Submitted by: Gene Expression Omnibus (GEO)<br>Study: Time-course transcriptome of wild-type <i>Arabidopsis</i> leaf                                    |
